# Supplementary material
Source: PubMed Central journal article supplement (PMC6134533)
Supplement: Appendix.pdf [file Appendix.pdf]

## APPENDIX

|                                    |                                                                                                                                               |
|------------------------------------|-----------------------------------------------------------------------------------------------------------------------------------------------|
| <b>Appendix I. Search Strategy</b> |                                                                                                                                               |
| <b>The Cochrane Library</b>        |                                                                                                                                               |
| <b>Search</b>                      | shoulder AND (joint instability OR instabil*) AND (rct OR random*)                                                                            |
| <b>Limits</b>                      | Publication date from 1994 to January 16, 2017<br>English, Dutch                                                                              |
| <b>PubMed</b>                      |                                                                                                                                               |
| <b>Search</b>                      | (shoulder[MeSH Terms] OR shoulder*[tiab] OR shoulder joint[MeSH Terms]) AND (random* or RCT) AND (joint instability[MeSH Terms] OR instabil*) |
| <b>Limits</b>                      | Publication date from 1994 to January 16, 2017<br>English, Dutch                                                                              |
| <b>EMBASE</b>                      |                                                                                                                                               |
| <b>Search</b>                      | (shoulder surgery OR shoulder) AND (joint instability) AND (randomized OR randomised OR random OR RCT)                                        |
| <b>Limits</b>                      | Publication date from 1994 to January 16, 2017                                                                                                |
| <b>Trip Database</b>               |                                                                                                                                               |
| <b>Search</b>                      | (shoulder OR shoulder joint) AND (random* or RCT) AND (joint instability OR instabil*)                                                        |
| <b>Limits</b>                      | Publication date from 1994 to January 16, 2017                                                                                                |

**Appendix II. Modified CLEAR-NPT**

|     |                                                                                                                                                                                                                                                                                                                                                                                                                                 |
|-----|---------------------------------------------------------------------------------------------------------------------------------------------------------------------------------------------------------------------------------------------------------------------------------------------------------------------------------------------------------------------------------------------------------------------------------|
| 1.  | Was the generation of allocation adequate?                                                                                                                                                                                                                                                                                                                                                                                      |
| 2.  | Was the treatment allocation concealed?                                                                                                                                                                                                                                                                                                                                                                                         |
| 3.  | Were details of the intervention administered to each group presented?                                                                                                                                                                                                                                                                                                                                                          |
| 4.  | Were details of the rehabilitation/follow-up process presented?                                                                                                                                                                                                                                                                                                                                                                 |
| 5.  | Was the experience or skill of the care providers in each arm presented?<br>5.1 Were years of experience presented for each healthcare provider?<br>5.2 Was the annual number of similar interventions performed by the same care provider presented?<br>5.3 Was the annual number of general interventions performed by the same care provider presented?<br>5.4 Was any account for care provider's learning curve presented? |
| 6.  | Was the experience or skill of the care providers in each arm appropriate?                                                                                                                                                                                                                                                                                                                                                      |
| 7.  | Was participant adherence assessed quantitatively?                                                                                                                                                                                                                                                                                                                                                                              |
| 8.  | Were participants adequately blinded?<br>8.1 In case of comparison of two operations with different operation marks (i.e. arthroscopic versus open operation) answer this item with "not-applicable".                                                                                                                                                                                                                           |
| 9.  | Was the level of activity of the patients adequately presented?<br>9.1 Was the number of contact/collision athletes and non-contact/collision athletes presented?<br>9.2 Was the number of athletes participating in competitive/recreational sports presented?                                                                                                                                                                 |
| 10. | Were details of the comorbidity/associated lesions presented?                                                                                                                                                                                                                                                                                                                                                                   |
| 11. | Were care providers or persons caring for the participants adequately blinded?<br>11.1 In case that the surgeon performing the operation was not blinded, was the person taking care of the follow up adequately blinded?                                                                                                                                                                                                       |
| 12. | Were all other aspects of treatment and care identical for each arm?                                                                                                                                                                                                                                                                                                                                                            |
| 13. | Were numbers of patients who were screened but found to be not eligible mentioned?<br>13.1 Are patients that withdrew or that were lost to follow-up presented?<br>13.2 Are they comparable for each arm?                                                                                                                                                                                                                       |
| 14. | Were outcome assessors adequately blinded to assess the primary outcomes?                                                                                                                                                                                                                                                                                                                                                       |
| 15. | If outcome assessors were not adequately blinded, were specific methods used to avoid ascertainment bias?                                                                                                                                                                                                                                                                                                                       |
| 16. | Was the follow-up schedule the same in each group?                                                                                                                                                                                                                                                                                                                                                                              |
| 17. | Were the main outcomes analyzed according to the intention-to-treat principle?                                                                                                                                                                                                                                                                                                                                                  |
| 18. | Was the amount of complications presented?                                                                                                                                                                                                                                                                                                                                                                                      |

### Appendix III. Study characteristics

|                              | Follow-up (months)   | Sample size | Intervention                                         | Control                                                             | Results group intervention                                                                                    |
|------------------------------|----------------------|-------------|------------------------------------------------------|---------------------------------------------------------------------|---------------------------------------------------------------------------------------------------------------|
| Archetti Netto <sup>18</sup> | 37.5 (mean)          | 50          | Arthroscopic techniques                              | Open techniques                                                     | DASH                                                                                                          |
| Bottoni <sup>19</sup>        | 32 (mean)            | 64          | Arthroscopic techniques                              | Open techniques                                                     | Failure, Operative time, SANE, SST, WOSI, UCLA, FF, ER, IR                                                    |
| Castagna <sup>20</sup>       | 24 (mean)            | 40          | Anterior suture anchors capsulorrhaphy               | Two posterior plications in addition to the anterior capsulorrhaphy | FF, ER add, ER ab<br>IR, UCLA, ASES, Constant                                                                 |
| Elmlund <sup>21</sup>        | 80 (median)          | 40          | Polygluconate-B polymer tack                         | Self-reinforced poly-L-lactic acid polymer tack                     | Failure, ER ab, STR, Constant, Rowe                                                                           |
| Fabbriciani <sup>22</sup>    | 24 for all patients  | 60          | Arthroscopic techniques                              | Open techniques                                                     | Recurrence, Rowe, Constant                                                                                    |
| Hiemstra <sup>23</sup>       | 194 (mean)           | 48          | Arthroscopic techniques                              | Open techniques                                                     | STR in 60° and 180°<br>IR and ER concentric and excentric                                                     |
| Jørgensen <sup>24</sup>      | 36 (median)          | 41          | Arthroscopic techniques with capsular plication      | Open techniques using Mitec anchors                                 | Dislocation, Subluxation, laxity, hospitalization duration, ROM, cosmetic complaints, Rowe, modified Constant |
| Magnusson <sup>25</sup>      | 25 (mean)            | 40          | Polygluconate-B polymer tack                         | Self-reinforced poly-L-lactic acid polymer tack                     | Failure, ROM, Rowe, Constant, radiographic visibility of drill holes                                          |
| Mahiroğulları <sup>26</sup>  | 26.1 (mean)          | 64          | Open Bankart repair                                  | Arthroscopic Bankart repair                                         | Rowe, VAS, ROM                                                                                                |
| McRae <sup>27</sup>          | 24 (minimum)         | 88          | Arthroscopic Bankart repair with ETAC                | Arthroscopic Bankart repair without ETAC                            | Dislocation, subluxation, WOSI, ASES, Constant                                                                |
| Milano <sup>28</sup>         | 24.5 (median)        | 78          | Arthroscopic stabilization with metal suture-anchors | Arthroscopic stabilization with biodegradable suture-anchors        | Dislocation, DASH, Rowe, Constant                                                                             |
| Mohtadi <sup>29</sup>        | 24 (mean not stated) | 196         | Arthroscopic techniques                              | Open techniques                                                     | Recurrence, WOSI, ASES                                                                                        |
| Monteiro <sup>30</sup>       | 31.47 (mean)         | 50          | Arthroscopic techniques with absorbable sutures      | Arthroscopic techniques with nonabsorbable sutures                  | Rowe, ASOSS                                                                                                   |

|                           |                       |     |                                                                              |                                                                                        |                                                                                        |
|---------------------------|-----------------------|-----|------------------------------------------------------------------------------|----------------------------------------------------------------------------------------|----------------------------------------------------------------------------------------|
| Norlin <sup>31</sup>      | 24 (mean not stated)  | 40  | Arthroscopic Bankart repair with Mitek anchors                               | Arthroscopic Bankart repair with bone sutures                                          | Stability, ROM, Rowe, concentric and eccentric STR                                     |
| Owens <sup>32</sup>       | 24 (minimum)          | 26  | Arthroscopic techniques                                                      | Open techniques                                                                        | SANE, WOSI, ASES, SST, Rowe, Tenger                                                    |
| Rhee <sup>33</sup>        | 12 (mean not stated)  | 60  | Open Bankart repair                                                          | Arthroscopic Bankart repair                                                            | STR                                                                                    |
| Robinson <sup>34</sup>    | 24 (minimum)          | 88  | Arthroscopic examination and joint lavage                                    | Arthroscopic examination and joint lavage and an anatomic repair of the Bankart lesion | Instability, DASH, WOSI, SF-36, ROM, satisfaction, health service costs, complications |
| Salomonsson <sup>35</sup> | 120 (mean not stated) | 66  | Bankart repair using Mitek GI/GII anchors combined with capsular imbrication | Putti-Platt procedure                                                                  | STR, Rowe, ROM, WOSI                                                                   |
| Sperber <sup>36</sup>     | 24 (mean not stated)  | 56  | Arthroscopic reconstruction with the use of biodegradable tacks              | Open reconstruction with suture anchors                                                | Recurrence, complications, reoperations                                                |
| Tan <sup>37</sup>         | 31 (mean)             | 130 | Arthroscopic Bankart repair with GII nonabsorbable anchor                    | Arthroscopic Bankart repair with Panalock absorbable anchor                            | Recurrent instability, level of sporting ability, Oxford Insability score, VAS, SF-12  |
| Warme <sup>38</sup>       | 25 (mean)             | 40  | Open Bankart repair with absorbable suture anchors                           | Open Bankart repair with nonabsorbable suture anchors                                  | Failure, Rowe                                                                          |
| Zaregade <sup>39</sup>    | Not stated            | 40  | Arthroscopic Bankart repair                                                  | Bristow procedure                                                                      | Constant, ASES, UCLA, Rowe, satisfaction                                               |

Abbreviations:

DASH = Disabilities of the Arm, Shoulder and Hand

ROM = range of motion

SANE = Single Assessment Numeric Evaluation

SST = Simple Shoulder Test

WOSI = Western Ontario Instability Index

UCLA = University of California, Los Angeles evaluation

FF = forward flexion

ER = external rotation; add= adducted, ab=abducted

IR = internal rotation

STR= strength

VAS = visual analog scale

ASES = American Shoulder and Elbow Surgeons Standardized Shoulder Assessment Form

ASOSS = Athletic Shoulder Outcome Scoring System

SF-36= short form 36, SF-12 = short form 12
